# Supplementary material for: Haem Iron Intake Is Associated with Increased Major Adverse Cardiovascular Events, All-Cause Mortality, Congestive Cardiac Failure, and Coronary Revascularisation in Older Men: The Concord Health and Ageing in Men Project
Source: Springer Nature journal article supplement (doi:10.1007/s12603-023-1945-6), 2023-07-01

- I. Supplementary Table 1.** Associations between different dietary iron intakes (mg/d) and serum iron ( $\mu\text{mol/L}$ ) using linear regression presented as beta coefficients (95% CI) (n = 522)
- II. Supplementary Table 2.** Associations between different dietary iron intakes and haemoglobin using linear regression presented as beta coefficients (95% CI) (n = 523)
- III. Supplementary Table 3.** Number (%) of major adverse cardiovascular events (MACE) and individual endpoints of MACE events stratified by tertiles of iron intakes (n = 539)
- IV. Supplementary Table 4.** Predictors of five-point MACE in univariate analysis unadjusted using Cox regression presented as hazard ratios (95% CI) (n=539)
- V. Supplementary Table 5.** Associations between dietary iron intakes and individual endpoints of MACE using Cox regression presented as hazard ratios (95% CI) (n = 539)
- VI. Supplementary Table 6.** Associations between dietary iron intakes, MACE and individual endpoints using Cox regression further adjusted with food subgroup intakes presented as hazard ratios (95% CI) (n = 516)
- VII. Supplementary Figure 1.** Linear relationship between HI intake and MACE through plotting decile midpoints of HI intake versus decile beta coefficients from fully adjusted analyses: (A) five-point MACE; (B) four-point MACE excluding all-cause mortality.
- VIII. Supplementary Figure 2.** Survival free of individual endpoints of MACE unadjusted analyses: (A) all-cause mortality; (B) CCF; (C) coronary revascularisation; (D) MI; (E) stroke.

**IX. Supplementary Figure 3.** Survival free of individual endpoints of MACE fully adjusted analyses: (A) all-cause mortality; (B) CCF; (C) coronary revascularisation; (D) MI; (E) stroke.

**Supplementary Table 1.** Associations between different dietary iron intakes (mg/d) and serum iron ( $\mu\text{mol/L}$ ) using linear regression presented as beta coefficients (95% CI) (n = 522)

| <b>Iron intake</b>               | <b>As continuous variable</b> |
|----------------------------------|-------------------------------|
| <b>Total iron<sup>a</sup></b>    |                               |
| Model 1                          | 0.04 (-0.02, 0.09) P = .20    |
| Model 2                          | 0.01 (-0.05, 0.07) P = .69    |
| Model 3                          |                               |
| Without haemoglobin              | 0.02 (-0.04, 0.08) P = .60    |
| With haemoglobin                 | 0.02 (-0.04, 0.08) P = .53    |
| <b>Haem iron<sup>b</sup></b>     |                               |
| Model 1                          | -0.25 (-0.77, 0.26) P = .33   |
| Model 2                          | -0.43 (-1.07, 0.22) P = .19   |
| Model 3                          |                               |
| Without haemoglobin              | -0.48 (-1.14, 0.19) P = .16   |
| With haemoglobin                 | -0.57 (-1.19, 0.06) P = .074  |
| <b>Non-haem iron<sup>c</sup></b> |                               |
| Model 1                          | 0.01 (-0.10, 0.13) P = .83    |
| Model 2                          | -0.08 (-0.23, 0.07) P = .29   |
| Model 3                          |                               |
| Without haemoglobin              | -0.08 (-0.24, 0.08) P = .33   |
| With haemoglobin                 | -0.03 (-0.18, 0.12) P = .73   |

*Notes:* Model 1 unadjusted (n = 522); Model 2 adjusted by sociodemographic and lifestyle factors (age (continuous), BMI (continuous), country of birth (Australia v. Greece/Italy v. other), marital status (married/de facto v. not married/divorced/separated/widowed/never married/other), age pension (only v. other), alcohol consumption (non-drinker v. ex-drinker v. safe drinker v. harmful drinker), smoking status (non-smoker v. ex-smoker v. current smoker), PASE (continuous), energy intake (continuous), Mediterranean diet score (continuous), number of serves of fruits (continuous), vegetables (continuous), grains (continuous), meat/alternatives (continuous), dairy/alternatives (continuous), and iron and/or multivitamin

supplement use (yes v. no)) (n = 509); Model 3 adjusted by Model 2 plus health (number of medications (continuous), frailty status (robust v. pre-frail v. frail), number of comorbidities (continuous) and IL-6 (continuous)) without haemoglobin (n = 476) and with haemoglobin (continuous) (n = 474)

**Supplementary Table 2.** Associations between different dietary iron intakes and haemoglobin using linear regression presented as beta coefficients (95% CI) (n = 523)

| <b>Iron intake</b>               | <b>As continuous variable</b> |
|----------------------------------|-------------------------------|
| <b>Total iron<sup>a</sup></b>    |                               |
| Model 1                          | -0.01 (-0.15, 0.12) P = .84   |
| Model 2                          | 0.00 (-0.14, 0.15) P = .96    |
| Model 3                          | 0.00 (-0.14, 0.14) P = .97    |
| <b>Haem iron<sup>b</sup></b>     |                               |
| Model 1                          | 0.70 (-0.56, 1.96) P = .27    |
| Model 2                          | 0.72 (-0.82, 2.26) P = .36    |
| Model 3                          | 0.64 (-0.90, 2.17) P = .82    |
| <b>Non-haem iron<sup>c</sup></b> |                               |
| Model 1                          | -0.13 (-0.41, 0.15) P = .37   |
| Model 2                          | -0.26 (-0.62, 0.10) P = .16   |
| Model 3                          | -0.28 (-0.64, 0.08) P = .13   |

*Notes:* Model 1 unadjusted (n = 523 for total); Model 2 adjusted by sociodemographic and lifestyle factors (age (continuous), BMI (continuous), country of birth (Australia v. Greece/Italy v. other), marital status (married/de facto v. not married/divorced/separated/widowed/never married/other), age pension (only v. other), alcohol consumption (non-drinker v. ex-drinker v. safe drinker v. harmful drinker), smoking status (non-smoker v. ex-smoker v. current smoker), PASE (continuous), energy intake (continuous), Mediterranean diet score (continuous), number of serves of fruits (continuous), vegetables (continuous), grains (continuous), meat/alternatives (continuous), dairy/alternatives (continuous), and iron and/or multivitamin supplement use (yes v. no)) (n = 509); Model 3 adjusted by Model 2 plus health (number of medications (continuous), frailty status (robust v. pre-frail v. frail), number of comorbidities (continuous) and IL-6 (continuous)) (n = 475 for total)

**Supplementary Table 3.** Number (%) of major adverse cardiovascular events (MACE) and individual endpoints of MACE events stratified by tertiles of iron intakes (n = 539)

| <b>Iron intake</b>                               | Bottom tertile | Middle tertile  | Top tertile |
|--------------------------------------------------|----------------|-----------------|-------------|
| <b>Total iron<sup>a</sup></b>                    | ≤11.26mg/d     | 11.27-14.75mg/d | ≥14.76mg/d  |
| Five-point MACE                                  | 63 (35.0)      | 51 (28.3)       | 54 (30.2)   |
| Four-point MACE excluding<br>all-cause mortality | 38 (39.6)      | 30 (31.3)       | 28 (29.2)   |
| All-cause mortality                              | 41 (22.8)      | 32 (17.8)       | 38 (21.2)   |
| Myocardial infarction                            | 6 (3.3)        | 6 (3.3)         | 8 (4.5)     |
| Congestive cardiac failure                       | 24 (13.3)      | 20 (11.1)       | 17 (9.5)    |
| Ischaemic stroke                                 | 8 (4.4)        | 4 (2.2)         | 5 (2.8)     |
| Coronary revascularisation                       | 3 (1.7)        | 7 (3.9)         | 5 (2.8)     |
| <b>Haem iron<sup>b</sup></b>                     | ≤1.40mg/d      | 1.41-2.10mg/d   | ≥2.11mg/d   |
| Five-point MACE                                  | 56 (31.1)      | 59 (32.8)       | 53 (29.6)   |
| Four-point MACE excluding<br>all-cause mortality | 31 (32.3)      | 33 (34.4)       | 32 (33.3)   |
| All-cause mortality                              | 35 (19.4)      | 40 (22.2)       | 36 (20.1)   |
| Myocardial infarction                            | 9 (5.0)        | 7 (3.9)         | 4 (2.2)     |
| Congestive cardiac failure                       | 16 (8.9)       | 25 (13.9)       | 20 (11.2)   |
| Ischaemic stroke                                 | 7 (3.9)        | 5 (2.8)         | 5 (2.8)     |
| Coronary revascularisation                       | 3 (1.7)        | 3 (1.7)         | 9 (5.0)     |
| <b>Non-haem iron<sup>c</sup></b>                 | ≤9.42mg/d      | 9.43-12.77mg/d  | ≥12.78mg/d  |
| Five-point MACE                                  | 64 (35.6)      | 47 (26.1)       | 57 (31.8)   |
| Four-point MACE excluding<br>all-cause mortality | 39 (40.6)      | 29 (30.2)       | 28 (29.2)   |
| All-cause mortality                              | 42 (23.3)      | 29 (16.1)       | 40 (22.3)   |
| Myocardial infarction                            | 6 (3.3)        | 7 (3.9)         | 7 (3.9)     |
| Congestive cardiac failure                       | 24 (13.3)      | 21 (11.7)       | 16 (8.9)    |
| Ischaemic stroke                                 | 8 (4.4)        | 4 (2.2)         | 5 (2.8)     |
| Coronary revascularisation                       | 6 (3.3)        | 3 (1.7)         | 6 (3.4)     |

<sup>a</sup> Bottom tertile  $\leq 11.26$ mg/d, n = 180 with median (IQR) 9.59 (8.24, 10.41); middle tertile 11.27-14.75mg/d, n = 180 with median (IQR) 12.71 (11.92, 13.66); top tertile  $\geq 14.76$ mg/d, n = 179 with median (IQR) 17.64 (15.98, 20.13)

<sup>b</sup> Bottom tertile  $\leq 1.40$ mg/d, n = 180 with median (IQR) 1.00 (0.75, 1.21); middle tertile 1.41-2.10mg/d, n = 180 with median (IQR) 1.74 (1.58, 1.92); top tertile  $\geq 2.11$ mg/d, n = 179 with median (IQR) 2.65 (2.38, 3.14)

<sup>c</sup> Bottom tertile  $\leq 9.42$ mg/d, n = 180 with median (IQR) 7.93 (6.72, 8.75); middle tertile 9.43-12.77mg/d, n = 180 with median (IQR) 10.86 (10.15, 11.62); top tertile  $\geq 12.78$ mg/d, n = 179, with median (IQR) 15.30 (13.81, 17.55)

**Supplementary Table 4.** Predictors of five-point MACE in univariate analysis unadjusted using Cox regression presented as hazard ratios (95% CI) (n=539)

| <b>Risk factor</b>                                                         | <b>Hazard ratios (95% CI)</b> |
|----------------------------------------------------------------------------|-------------------------------|
| Age                                                                        | 1.11 (1.08, 1.14) P < .001    |
| BMI (kg/m <sup>2</sup> ) (n = 533)                                         | 0.96 (0.92, 0.99) P = .012    |
| Country of birth                                                           |                               |
| Australia (reference)                                                      | 1                             |
| Greece/ Italy                                                              | 0.68 (0.46, 1.02) P = .061    |
| Other                                                                      | 0.88 (0.61, 1.28) P = .51     |
| Source of income (n = 538)                                                 |                               |
| Age Pension only                                                           | 1                             |
| Other                                                                      | 0.78 (0.57, 1.05) P = .11     |
| Energy intake                                                              | 1.00 (1.00,1.00) P = .61      |
| Vegetables                                                                 | 0.93 (0.86, 1.01) P = .067    |
| Fruit                                                                      | 0.94 (0.84, 1.05) P = .25     |
| Meat/alternatives                                                          | 0.81 (0.71, 0.93) P = .002    |
| Grains                                                                     | 0.93 (0.86, 1.00) P = .040    |
| Medication use                                                             |                               |
| Neither NSAID, anticoagulant, antiplatelet,<br>PPI and/or H2RA (reference) | 1                             |
| NSAID, anticoagulant and/or antiplatelet<br>only                           | 1.32 (0.92, 1.90) P = .14     |
| PPI and/or H2RA only                                                       | 1.23 (0.76, 2.00) P = .40     |
| NSAID, anticoagulant and/or antiplatelet<br>with PPI and/or H2RA           | 1.76 (1.12, 2.76) P = .013    |
| Haemoglobin (g/L) (n = 523)                                                | 0.98 (0.97, 0.99) P < .001    |
| Anaemia (n = 523) (Haemoglobin<130g/L)                                     |                               |
| No (reference)                                                             | 1                             |
| Yes                                                                        | 1.65 (1.13, 2.41) P = .009    |
| Frailty status (n = 534)                                                   |                               |
| Robust (reference)                                                         | 1                             |
| Pre-frail                                                                  | 1.59 (1.14, 2.20) P = .006    |
| Frail                                                                      | 5.47 (3.19, 9.38) P < .001    |



Chronic Kidney Disease (eGFR

<60mL/min/1.73m<sup>2</sup>) (n = 525)

No (reference) 1

Yes 1.50 (1.10, 2.06) P = .011

---

**Supplementary Table 5.** Associations between dietary iron intakes and individual endpoints of MACE using Cox regression presented as hazard ratios (95% CI) (n = 539)

| <b>Iron intake</b>                | Bottom tertile<br>(reference category) | Middle tertile                | Top tertile                  | As continuous variable        |
|-----------------------------------|----------------------------------------|-------------------------------|------------------------------|-------------------------------|
| <b>Total iron<sup>a</sup></b>     | ≤11.26mg/d                             | 11.27-14.75mg/d               | ≥14.76mg/d                   | +1mg/d                        |
| <b>All-cause mortality</b>        |                                        |                               |                              |                               |
| Model 1                           | 1                                      | 0.68 (0.43, 1.08)<br>P = .10  | 0.81 (0.52, 1.26)<br>P = .36 | 1.01 (0.99, 1.03)<br>P = .24  |
| Model 2                           | 1                                      | 0.63 (0.38, 1.04)<br>P = .071 | 0.63 (0.35, 1.13)<br>P = .12 | 1.00 (0.98, 1.02)<br>P = .86  |
| Model 3                           | 1                                      | 0.63 (0.37, 1.06)<br>P = .084 | 0.63 (0.35, 1.13)<br>P = .12 | 1.00 (0.98, 1.02)<br>P = .83  |
| <b>Congestive cardiac failure</b> |                                        |                               |                              |                               |
| Model 1                           | 1                                      | 0.75 (0.41, 1.36)<br>P = .34  | 0.64 (0.34, 1.19)<br>P = .16 | 0.99 (0.95, 1.03)<br>P = .62  |
| Model 2                           | 1                                      | 1.02 (0.52, 2.00)<br>P = .95  | 1.06 (0.47, 2.39)<br>P = .88 | 1.00 (0.97, 1.03)<br>P = .99  |
| Model 3                           | 1                                      | 1.11 (0.56, 2.21)<br>P = .77  | 0.99 (0.43, 2.25)<br>P = .98 | 1.00 (0.96, 1.03)<br>P = 1.00 |
| <b>Coronary revascularisation</b> |                                        |                               |                              |                               |
| Model 1                           | 1                                      | 2.09 (0.54, 8.11)<br>P = .29  | 1.54 (0.37, 6.47)<br>P = .56 | 1.00 (0.94, 1.06)<br>P = .99  |
| Model 2                           | 1                                      | 2.56 (0.63, 10.47)<br>P = .19 | 1.70 (0.30, 9.85)<br>P = .55 | 1.00 (0.93, 1.08)<br>P = .97  |
| Model 3 <sup>†</sup>              | 1                                      | 2.44 (0.59, 10.15)<br>P = .22 | 1.66 (0.28, 9.69)<br>P = .58 | 1.00 (0.92, 1.08)<br>P = .98  |

**Myocardial  
infarction**

|                      |   |                              |                              |                              |
|----------------------|---|------------------------------|------------------------------|------------------------------|
| Model 1              | 1 | 0.88 (0.28, 2.73)<br>P = .82 | 1.15 (0.40, 3.34)<br>P = .79 | 1.01 (0.97, 1.05)<br>P = .59 |
| Model 2              | 1 | 1.26 (0.37, 4.30)<br>P = .72 | 1.76 (0.45, 6.80)<br>P = .42 | 1.00 (0.96, 1.05)<br>P = .84 |
| Model 3 <sup>#</sup> | 1 | 1.55 (0.40, 5.98)<br>P = .52 | 2.20 (0.49, 9.87)<br>P = .31 | 1.01 (0.97, 1.06)<br>P = .67 |

**Ischaemic stroke**

|         |   |                              |                              |                              |
|---------|---|------------------------------|------------------------------|------------------------------|
| Model 1 | 1 | 0.45 (0.14, 1.51)<br>P = .20 | 0.57 (0.19, 1.75)<br>P = .33 | 0.99 (0.93, 1.06)<br>P = .85 |
| Model 2 | 1 | 0.61 (0.17, 2.23)<br>P = .45 | 0.94 (0.22, 4.13)<br>P = .94 | 1.01 (0.96, 1.06)<br>P = .71 |
| Model 3 | 1 | 0.59 (0.16, 2.22)<br>P = .43 | 0.78 (0.17, 3.56)<br>P = .74 | 1.01 (0.95, 1.06)<br>P = .83 |

|                        |           |               |           |        |
|------------------------|-----------|---------------|-----------|--------|
| Haem iron <sup>b</sup> | ≤1.40mg/d | 1.41-2.10mg/d | ≥2.11mg/d | +1mg/d |
|------------------------|-----------|---------------|-----------|--------|

**All-cause  
mortality**

|         |   |                              |                              |                               |
|---------|---|------------------------------|------------------------------|-------------------------------|
| Model 1 | 1 | 1.16 (0.74, 1.83)<br>P = .52 | 1.03 (0.65, 1.64)<br>P = .90 | 1.11 (0.93, 1.33)<br>P = .23  |
| Model 2 | 1 | 1.39 (0.83, 2.33)<br>P = .22 | 1.49 (0.82, 2.71)<br>P = .19 | 1.50 (1.14, 1.97)<br>P = .004 |
| Model 3 | 1 | 1.56 (0.91, 2.67)<br>P = .10 | 1.60 (0.87, 2.95)<br>P = .13 | 1.51 (1.15, 1.99)<br>P = .003 |

**Congestive  
cardiac failure**

|         |   |                               |                               |                               |
|---------|---|-------------------------------|-------------------------------|-------------------------------|
| Model 1 | 1 | 1.61 (0.86, 3.01)<br>P = .14  | 1.25 (0.65, 2.41)<br>P = .51  | 1.14 (0.89, 1.47)<br>P = .30  |
| Model 2 | 1 | 2.70 (1.32, 5.55)<br>P = .007 | 2.92 (1.27, 6.76)<br>P = .012 | 2.01 (1.41, 2.87)<br>P < .001 |
| Model 3 | 1 | 3.10 (1.43, 6.73)<br>P = .004 | 3.07 (1.28, 7.35)<br>P = .012 | 2.08 (1.45, 2.98)<br>P < .001 |

**Coronary****revascularisation**

|                      |   |                              |                              |                               |
|----------------------|---|------------------------------|------------------------------|-------------------------------|
| Model 1              | 1 | 0.99 (0.20, 4.89)<br>P = .99 | 3.04 (0.82, 11.22) P = .096  | 1.88 (1.30, 2.72)<br>P = .001 |
| Model 2              | 1 | 0.68 (0.13, 3.56)<br>P = .65 | 2.11 (0.49, 9.16)<br>P = .32 | 1.98 (1.20, 3.26)<br>P = .007 |
| Model 3 <sup>†</sup> | 1 | 0.70 (0.13, 3.81)<br>P = .68 | 2.13 (0.49, 9.36)<br>P = .32 | 1.89 (1.15, 3.10)<br>P = .012 |

**Myocardial****infarction**

|                      |   |                              |                              |                              |
|----------------------|---|------------------------------|------------------------------|------------------------------|
| Model 1              | 1 | 0.78 (0.29, 2.11)<br>P = .63 | 0.44 (0.14, 1.43)<br>P = .17 | 0.78 (0.46, 1.32)<br>P = .35 |
| Model 2              | 1 | 0.90 (0.30, 2.71)<br>P = .85 | 0.58 (0.15, 2.35)<br>P = .45 | 1.01 (0.51, 1.98)<br>P = .98 |
| Model 3 <sup>#</sup> | 1 | 0.89 (0.27, 2.95)<br>P = .85 | 0.58 (0.12, 2.81)<br>P = .50 | 1.09 (0.56, 2.14)<br>P = .80 |

**Ischaemic stroke**

|         |   |                              |                              |                              |
|---------|---|------------------------------|------------------------------|------------------------------|
| Model 1 | 1 | 0.71 (0.23, 2.25)<br>P = .56 | 0.72 (0.23, 2.25)<br>P = .57 | 0.90 (0.53, 1.55)<br>P = .70 |
| Model 2 | 1 | 0.69 (0.20, 2.44)<br>P = .57 | 0.83 (0.21, 3.34)<br>P = .79 | 1.08 (0.53, 2.21)<br>P = .84 |
| Model 3 | 1 | 0.67 (0.19, 2.35)<br>P = .53 | 0.81 (0.20, 3.31)<br>P = .76 | 1.06 (0.53, 2.13)<br>P = .87 |

|                            |           |                |            |        |
|----------------------------|-----------|----------------|------------|--------|
| Non-haem iron <sup>c</sup> | ≤9.42mg/d | 9.43-12.77mg/d | ≥12.78mg/d | +1mg/d |
|----------------------------|-----------|----------------|------------|--------|

**All-cause****mortality**

|         |   |                               |                              |                               |
|---------|---|-------------------------------|------------------------------|-------------------------------|
| Model 1 | 1 | 0.60 (0.38, 0.97)<br>P = .037 | 0.84 (0.54, 1.29)<br>P = .42 | 0.99 (0.95, 1.03)<br>P = .57  |
| Model 2 | 1 | 0.54 (0.32, 0.90)<br>P = .018 | 0.65 (0.36, 1.17)<br>P = .15 | 0.95 (0.89, 1.01)<br>P = .12  |
| Model 3 | 1 | 0.56 (0.33, 0.96)<br>P = .035 | 0.65 (0.35, 1.18)<br>P = .16 | 0.94 (0.88, 1.00)<br>P = .055 |

**Congestive  
cardiac failure**

|         |   |                              |                              |                              |
|---------|---|------------------------------|------------------------------|------------------------------|
| Model 1 | 1 | 0.79 (0.44, 1.43)<br>P = .44 | 0.60 (0.32, 1.13)<br>P = .11 | 0.97 (0.90, 1.03)<br>P = .31 |
| Model 2 | 1 | 1.02 (0.53, 1.99)<br>P = .94 | 0.86 (0.37, 1.99)<br>P = .73 | 1.02 (0.94, 1.10)<br>P = .68 |
| Model 3 | 1 | 1.11 (0.56, 2.21)<br>P = .77 | 0.84 (0.35, 1.99)<br>P = .69 | 1.00 (0.92, 1.08)<br>P = .95 |

**Coronary  
revascularisation**

|                      |   |                              |                              |                              |
|----------------------|---|------------------------------|------------------------------|------------------------------|
| Model 1              | 1 | 0.44 (0.11, 1.76)<br>P = .24 | 0.91 (0.29, 2.84)<br>P = .87 | 1.00 (0.88, 1.13)<br>P = .99 |
| Model 2              | 1 | 0.53 (0.12, 2.27)<br>P = .39 | 0.94 (0.21, 4.24)<br>P = .93 | 1.00 (0.84, 1.19)<br>P = .99 |
| Model 3 <sup>†</sup> | 1 | 0.45 (0.10, 1.97)<br>P = .29 | 0.84 (0.18, 3.98)<br>P = .82 | 1.00 (0.83, 1.20)<br>P = .97 |

**Myocardial  
infarction**

|                      |   |                              |                              |                              |
|----------------------|---|------------------------------|------------------------------|------------------------------|
| Model 1              | 1 | 1.03 (0.34, 3.06)<br>P = .96 | 1.01 (0.34, 3.01)<br>P = .99 | 1.03 (0.95, 1.13)<br>P = .45 |
| Model 2              | 1 | 1.28 (0.40, 4.12)<br>P = .68 | 1.31 (0.32, 5.40)<br>P = .71 | 1.03 (0.94, 1.13)<br>P = .56 |
| Model 3 <sup>#</sup> | 1 | 1.52 (0.43, 5.36)<br>P = .52 | 1.48 (0.32, 6.90)<br>P = .62 | 1.04 (0.93, 1.15)<br>P = .52 |

**Ischaemic stroke**

|         |   |                              |                              |                              |
|---------|---|------------------------------|------------------------------|------------------------------|
| Model 1 | 1 | 0.46 (0.14, 1.53)<br>P = .20 | 0.57 (0.19, 1.76)<br>P = .33 | 0.93 (0.81, 1.06)<br>P = .28 |
| Model 2 | 1 | 0.62 (0.17, 2.30)<br>P = .48 | 0.95 (0.21, 4.25)<br>P = .94 | 0.99 (0.83, 1.18)<br>P = .92 |
| Model 3 | 1 | 0.65 (0.17, 2.47)<br>P = .53 | 0.93 (0.18, 3.85)<br>P = .82 | 0.96 (0.81, 1.14)<br>P = .65 |

---

*Notes:* Model 1 unadjusted (n = 539 for total, 111 all-cause mortality, 15 coronary revascularisation, 61 congestive cardiac failure, 20 myocardial infarction, and 17 stroke); Model 2 adjusted by age (continuous), BMI (continuous), country of birth (Australia v. Greece/Italy v. other), age pension (only v. other), energy intake (continuous), number of serves of vegetables (continuous), fruit (continuous), meat/alternatives (continuous), grains (continuous) (n = 532 for total, 108 all-cause mortality, 60 congestive cardiac failure, 15 coronary revascularisation, 20 myocardial infarction, and 17 stroke); Model 3 adjusted by Model 2 plus NSAID, anticoagulant, antiplatelet and/or PPI or H2RA use (NSAID, anticoagulant and/or antiplatelet only v. PPI and/or H2RA only v. NSAID, anticoagulant and/or antiplatelet with PPI and/or H2RA v. neither NSAID, antiplatelet, anticoagulant, PPI or H2RA), haemoglobin (continuous), frailty status (robust v. pre-frail v. frail), and CKD (yes v. no) (n = 516 for total, 106 all-cause mortality, 57 congestive cardiac failure, and 17 stroke).

<sup>†</sup>Due to small numbers frailty status could not be included as covariates for coronary revascularisation. Model 3 (n = 516 for total and 15 coronary revascularisation).

<sup>#</sup>Due to small numbers NSAID, anticoagulant, antiplatelet, PPI and/or H2RA use could not be included as a covariate for myocardial infarction. Model 3 (n = 516 for total and 18 myocardial infarction).

<sup>a</sup> Bottom tertile  $\leq 11.26$ mg/d, n = 180 with median (IQR) 9.59 (8.24, 10.41); middle tertile 11.27-14.75mg/d, n = 180 with median (IQR) 12.71 (11.92, 13.66); top tertile  $\geq 14.76$ mg/d, n = 179 with median (IQR) 17.64 (15.98, 20.13)

<sup>b</sup> Bottom tertile  $\leq 1.40$ mg/d, n = 180 with median (IQR) 1.00 (0.75, 1.21); middle tertile 1.41-2.10mg/d, n = 180 with median (IQR) 1.74 (1.58, 1.92); top tertile  $\geq 2.11$ mg/d, n = 179 with median (IQR) 2.65 (2.38, 3.14)

<sup>c</sup> Bottom tertile  $\leq 9.42$ mg/d, n = 180 with median (IQR) 7.93 (6.72, 8.75); middle tertile 9.43-12.77mg/d, n = 180 with median (IQR) 10.86 (10.15, 11.62); top tertile  $\geq 12.78$ mg/d, n = 179, with median (IQR) 15.30 (13.81, 17.55)

**Supplementary Table 6.** Associations between dietary iron intakes, MACE and individual endpoints using Cox regression further adjusted with food subgroup intakes presented as hazard ratios (95% CI) (n = 516)

| <b>Iron intake</b>                            | Bottom tertile<br>(reference category) | Middle tertile                | Top tertile                   | As continuous variable        |
|-----------------------------------------------|----------------------------------------|-------------------------------|-------------------------------|-------------------------------|
| <b>Total iron<sup>a</sup></b>                 | ≤11.26mg/d                             | 11.27-14.75mg/d               | ≥14.76mg/d                    | +1mg/d                        |
| Five-point MACE                               | 1                                      | 0.79 (0.52, 1.20)<br>P = .27  | 0.82 (0.50, 1.34)<br>P = .43  | 1.00 (0.99, 1.02)<br>P = .74  |
| Four-point MACE excluding all-cause mortality |                                        | 0.97 (0.56, 1.67)<br>P = .90  | 1.09 (0.57, 2.09)<br>P = .80  | 1.00 (0.97, 1.02)<br>P = .93  |
| All-cause mortality                           | 1                                      | 0.61 (0.36, 1.03)<br>P = .065 | 0.63 (0.34, 1.17)<br>P = .14  | 1.00 (0.98, 1.02)<br>P = .99  |
| Congestive cardiac failure                    | 1                                      | 1.08 (0.54, 2.15)<br>P = .83  | 1.07 (0.46, 2.50)<br>P = .87  | 0.99 (0.96, 1.02)<br>P = .59  |
| Coronary revascularisation <sup>†</sup>       | 1                                      | 1.78 (0.42, 7.62)<br>P = .43  | 1.37 (0.23, 8.29)<br>P = .73  | 1.00 (0.91, 1.09)<br>P = .96  |
| Myocardial infarction <sup>#</sup>            | 1                                      | 1.42 (0.36, 5.54)<br>P = .62  | 2.27 (0.47, 10.88)<br>P = .31 | 1.01 (0.97, 1.05)<br>P = .71  |
| Ischaemic stroke                              | 1                                      | 0.57 (0.15, 2.18)<br>P = .42  | 0.81 (0.17, 3.82)<br>P = .79  | 1.00 (0.94, 1.06)<br>P = .95  |
| <b>Haem iron<sup>b</sup></b>                  | ≤1.40mg/d                              | 1.41-2.10mg/d                 | ≥2.11mg/d                     | +1mg/d                        |
| Five-point MACE                               | 1                                      | 1.20 (0.75, 1.91)<br>P = .45  | 1.09 (0.60, 2.00)<br>P = .78  | 1.42 (1.05, 1.91)<br>P = .024 |
| Four-point MACE excluding all-cause mortality |                                        | 1.17 (0.63, 2.18)<br>P = .62  | 1.14 (0.51, 2.53)<br>P = .75  | 1.53 (1.08, 2.17)<br>P = .016 |
| All-cause mortality                           | 1                                      | 1.35 (0.75, 2.40)<br>P = .32  | 1.22 (0.58, 2.56)<br>P = .61  | 1.51 (1.03, 2.22)<br>P = .036 |



|                                               |   |                               |                               |                               |
|-----------------------------------------------|---|-------------------------------|-------------------------------|-------------------------------|
| Congestive cardiac failure                    | 1 | 2.88 (1.26, 6.60)<br>P = .013 | 2.66 (0.92, 7.66)<br>P = .070 | 2.10 (1.40, 3.16)<br>P < .001 |
| Coronary revascularisation <sup>†</sup>       | 1 | 0.59 (0.10, 3.49)<br>P = .56  | 1.34 (0.20, 8.91)<br>P = .76  | 2.80 (1.18, 6.60)<br>P = .019 |
| Myocardial infarction <sup>#</sup>            | 1 | 0.43 (0.11, 1.68)<br>P = .22  | 0.14 (0.01, 1.28)<br>P = .081 | 0.58 (0.19, 1.75)<br>P = .34  |
| Ischaemic stroke                              | 1 | 0.47 (0.12, 1.89)<br>P = .29  | 0.41 (0.06, 2.67)<br>P = .35  | 0.72 (0.24, 2.13)<br>P = .55  |
| Non-haem iron <sup>c</sup>                    |   | ≤9.42mg/d                     | 9.43-12.77mg/d                | ≥12.78mg/d                    |
|                                               |   | +1mg/d                        |                               |                               |
| Five-point MACE                               | 1 | 0.75 (0.49, 1.15)<br>P = .19  | 0.91 (0.55, 1.50)<br>P = .71  | 0.98 (0.94, 1.03)<br>P = .40  |
| Four-point MACE excluding all-cause mortality |   | 0.98 (0.56, 1.70)<br>P = .94  | 1.12 (0.57, 2.22)<br>P = .75  | 1.02 (0.96, 1.08)<br>P = .60  |
| All-cause mortality                           | 1 | 0.57 (0.33, 0.98)<br>P = .043 | 0.70 (0.37, 1.33)<br>P = .28  | 0.94 (0.88, 1.01)<br>P = .071 |
| Congestive cardiac failure                    | 1 | 1.24 (0.62, 2.49)<br>P = .54  | 1.01 (0.41, 2.49)<br>P = .99  | 1.01 (0.93, 1.09)<br>P = .90  |
| Coronary revascularisation <sup>†</sup>       | 1 | 0.54 (0.12, 2.47)<br>P = .43  | 1.16 (0.23, 5.89)<br>P = .86  | 1.01 (0.84, 1.23)<br>P = .90  |
| Myocardial infarction <sup>#</sup>            | 1 | 1.64 (0.44, 6.04)<br>P = .46  | 1.76 (0.33, 9.27)<br>P = .50  | 1.03 (0.92, 1.14)<br>P = .65  |
| Ischaemic stroke                              | 1 | 0.69 (0.18, 2.68)<br>P = .59  | 0.95 (0.19, 4.79)<br>P = .95  | 0.96 (0.81, 1.13)<br>P = .59  |

*Notes:* Adjusted for age (continuous), BMI (continuous), country of birth (Australia v. Greece/Italy v. other), age pension (only v. other), energy intake (continuous), number of serves of vegetables (continuous), fruit (continuous), meat/alternatives (continuous), grains (continuous), NSAID, anticoagulant, antiplatelet and/or PPI or H2RA use (NSAID, anticoagulant and/or antiplatelet only v. PPI and/or H2RA only v. NSAID, anticoagulant and/or antiplatelet with PPI and/or H2RA v. neither NSAID, antiplatelet, anticoagulant, PPI or H2RA), haemoglobin (continuous), frailty status (robust v. pre-frail v. frail), and CKD (yes v.

no), number of serves of red meat (continuous), poultry (continuous), processed meat (continuous), and seafood (continuous) (n = 516 for total, 160 five-point MACE, 92 four-point MACE excluding all-cause mortality, 106 all-cause mortality, 57 congestive cardiac failure and 17 stroke).

<sup>†</sup>Due to small numbers frailty status could not be included as covariates for coronary revascularisation (n = 516 for total and 15 coronary revascularisation).

<sup>#</sup>Due to small numbers NSAID, anticoagulant, antiplatelet, PPI and/or H2RA use could not be included as a covariate for myocardial infarction (n = 516 for total and 18 for myocardial infarction).

<sup>a</sup> Bottom tertile  $\leq 11.26$ mg/d, n = 180 with median (IQR) 9.59 (8.24, 10.41); middle tertile 11.27-14.75mg/d, n = 180 with median (IQR) 12.71 (11.92, 13.66); top tertile  $\geq 14.76$ mg/d, n = 179 with median (IQR) 17.64 (15.98, 20.13)

<sup>b</sup> Bottom tertile  $\leq 1.40$ mg/d, n = 180 with median (IQR) 1.00 (0.75, 1.21); middle tertile 1.41-2.10mg/d, n = 180 with median (IQR) 1.74 (1.58, 1.92); top tertile  $\geq 2.11$ mg/d, n = 179 with median (IQR) 2.65 (2.38, 3.14)

<sup>c</sup> Bottom tertile  $\leq 9.42$ mg/d, n = 180 with median (IQR) 7.93 (6.72, 8.75); middle tertile 9.43-12.77mg/d, n = 180 with median (IQR) 10.86 (10.15, 11.62); top tertile  $\geq 12.78$ mg/d, n = 179, with median (IQR) 15.30 (13.81, 17.55)

**Supplementary Figure 1.** Linear relationship between HI intake and MACE through plotting decile midpoints of HI intake versus decile beta coefficients from fully adjusted analyses: (A) five-point MACE; (B) four-point MACE excluding all-cause mortality.

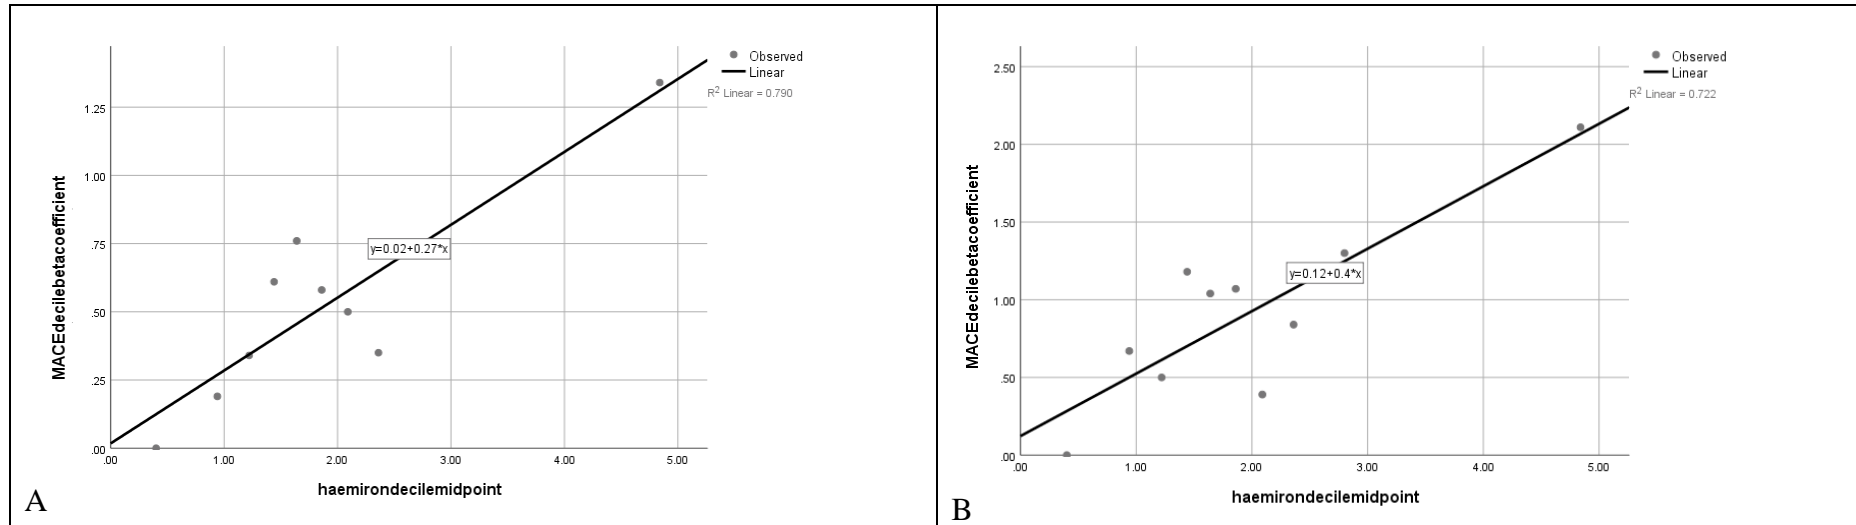

**Supplementary Figure 2.** Survival free of individual endpoints of MACE unadjusted analyses: (A) all-cause mortality; (B) CCF; (C) coronary revascularisation; (D) MI; (E) stroke. MACE = major adverse cardiovascular event; CCF = congestive cardiac failure; revas = coronary revascularisation; MI = myocardial infarction; Cum = cumulative; Futime = follow-up time.

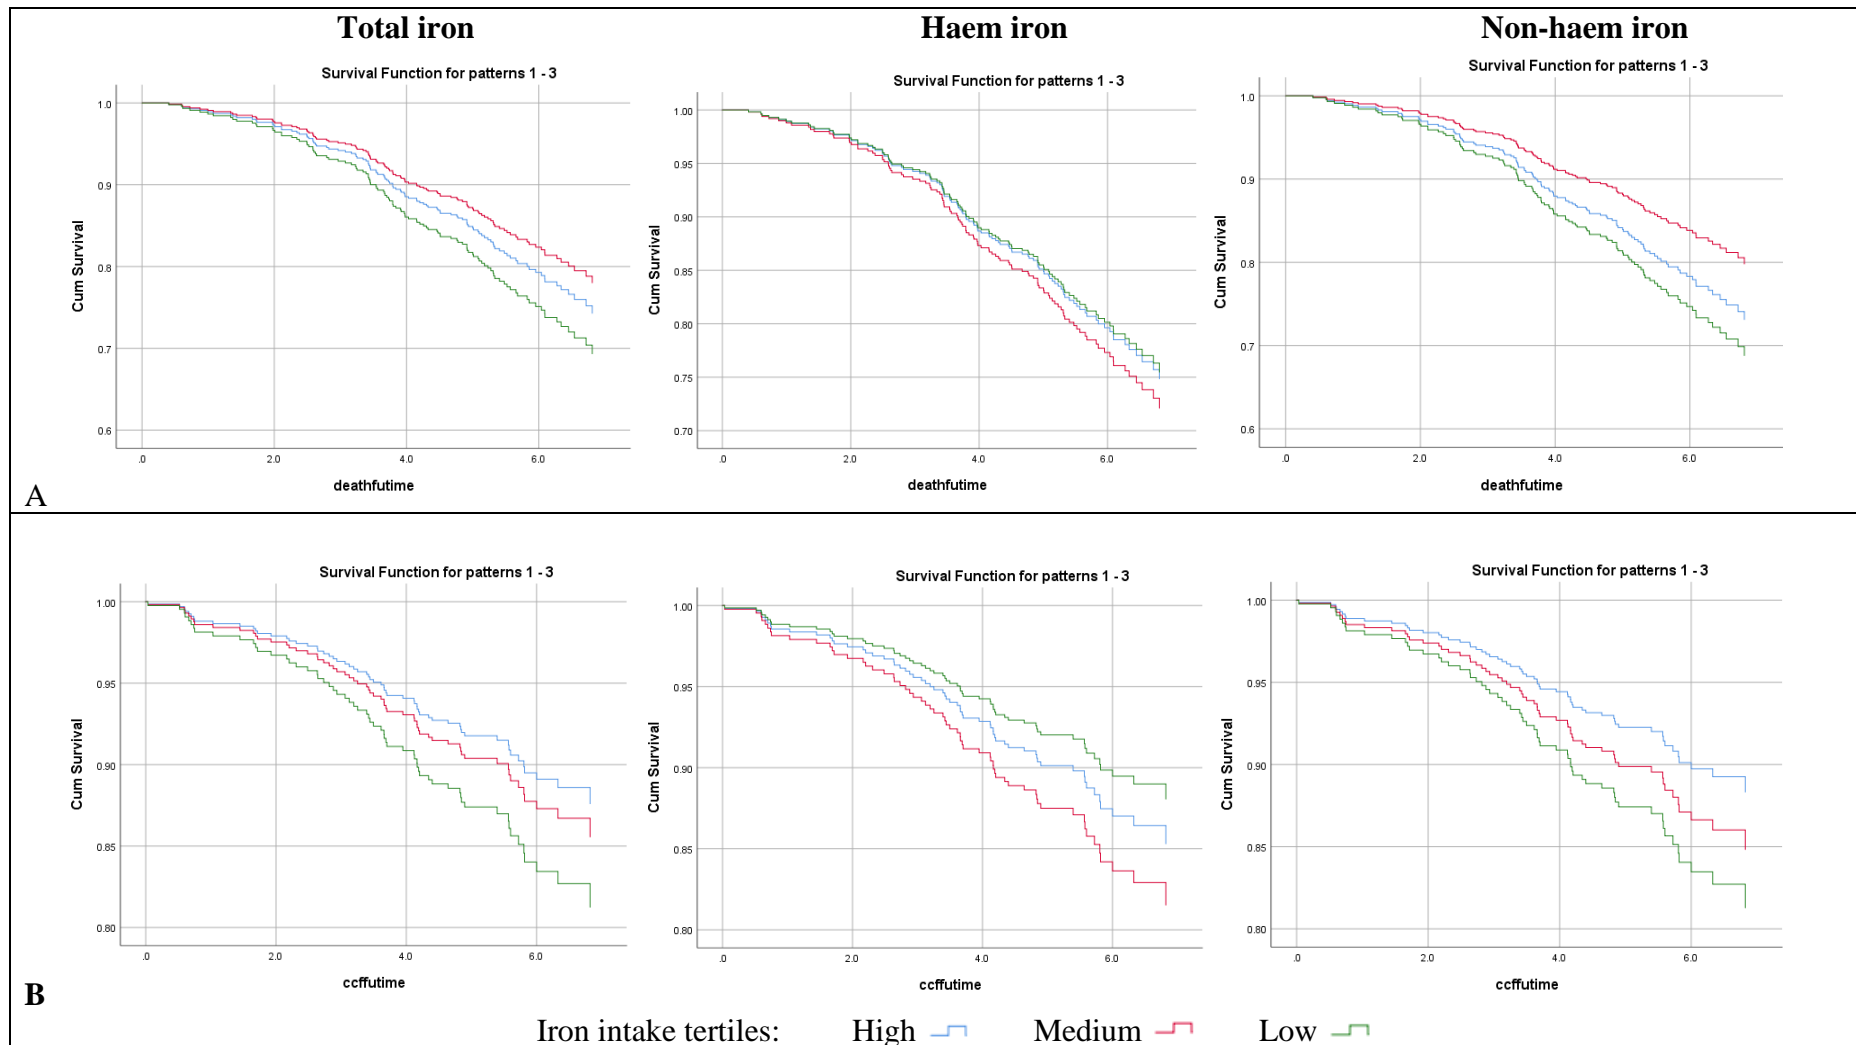

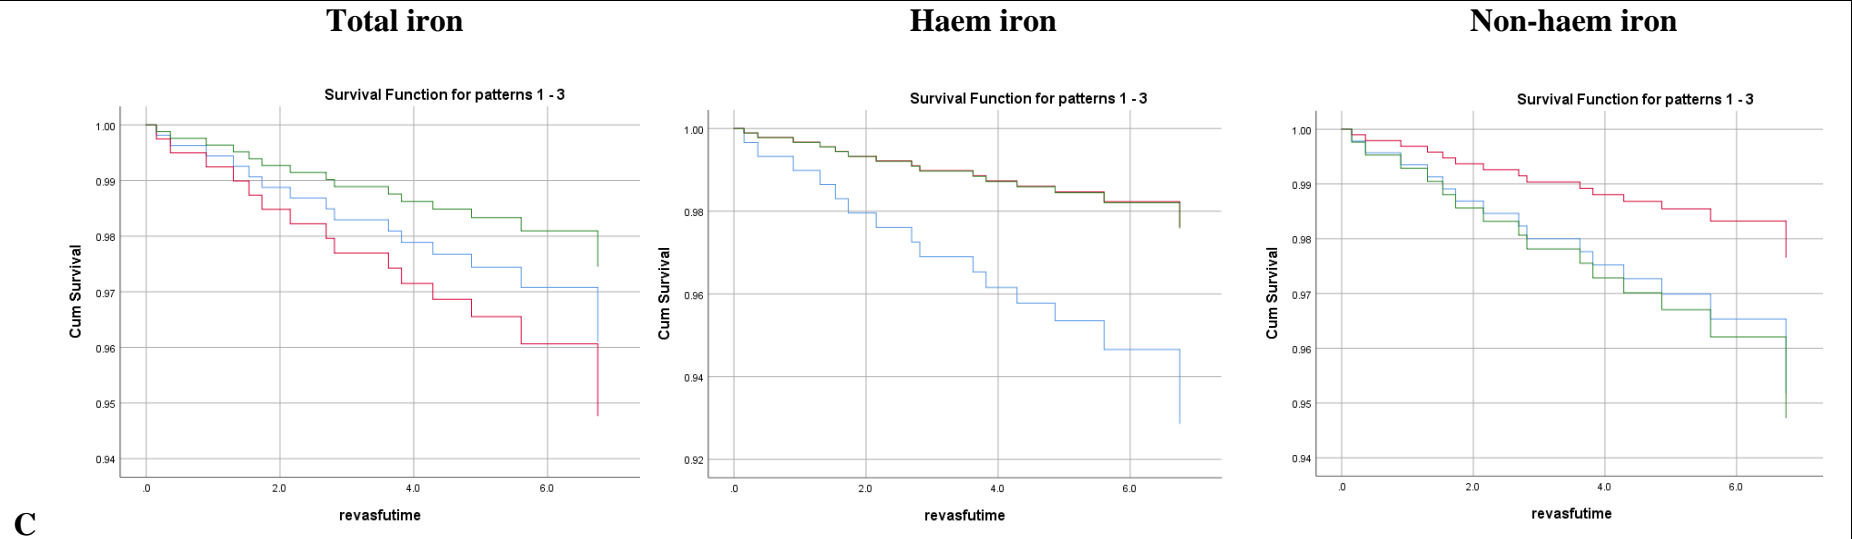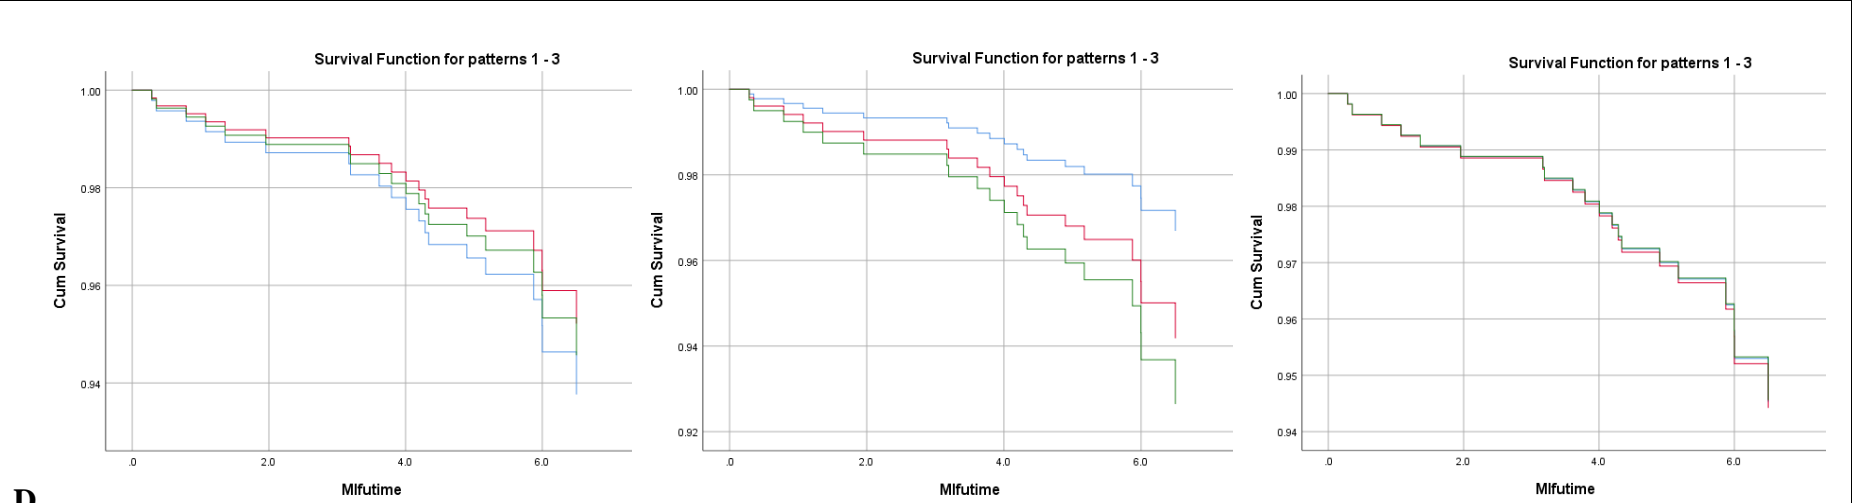

Iron intake tertiles: High  Medium  Low 

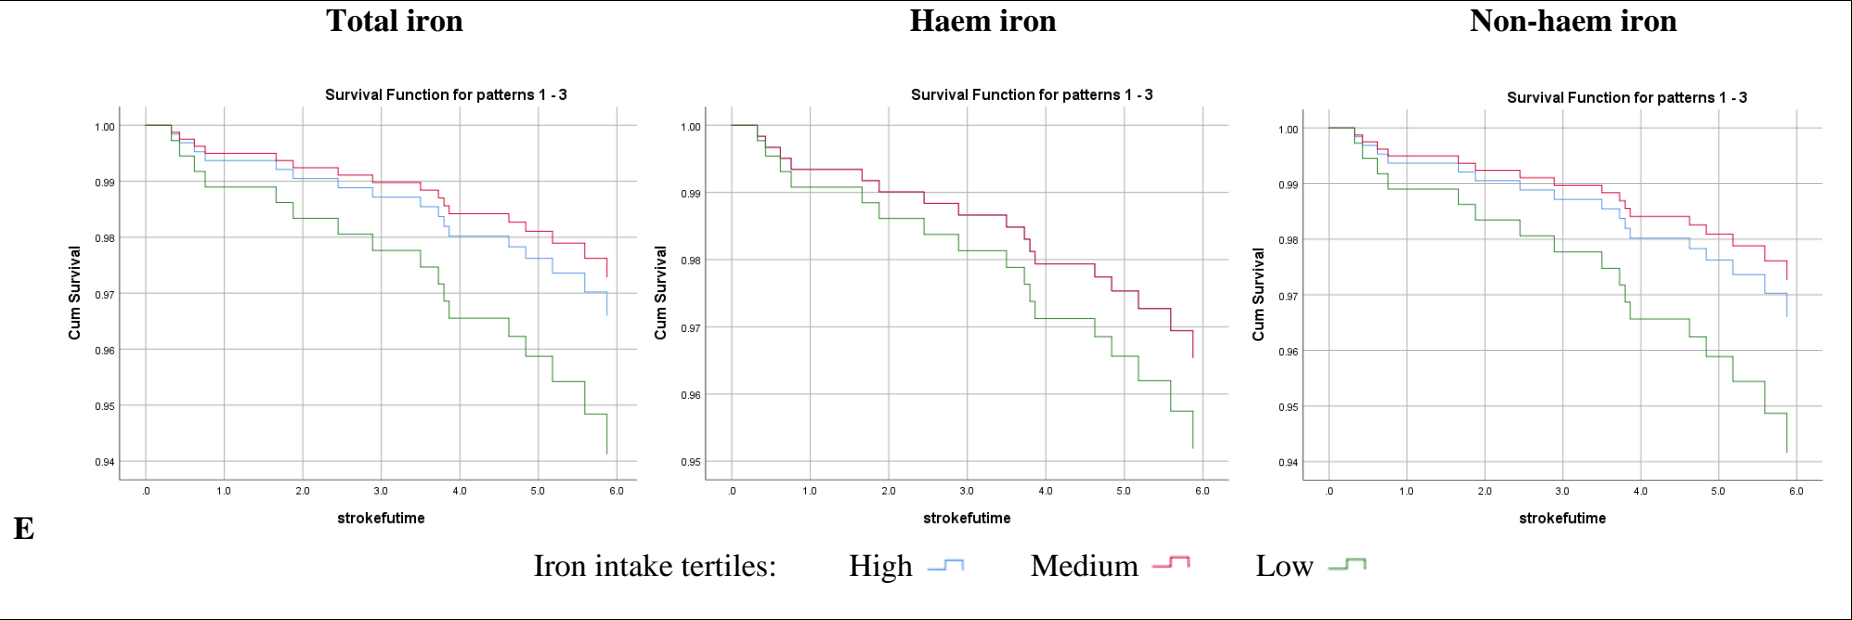

**Supplementary Figure 3.** Survival free of individual endpoints of MACE fully adjusted analyses: (A) all-cause mortality; (B) CCF; (C) coronary revascularisation; (D) MI; (E) stroke. MACE = major adverse cardiovascular event; CCF = congestive cardiac failure; revas = coronary revascularisation; MI = myocardial infarction; Cum = cumulative; Futime = follow-up time.

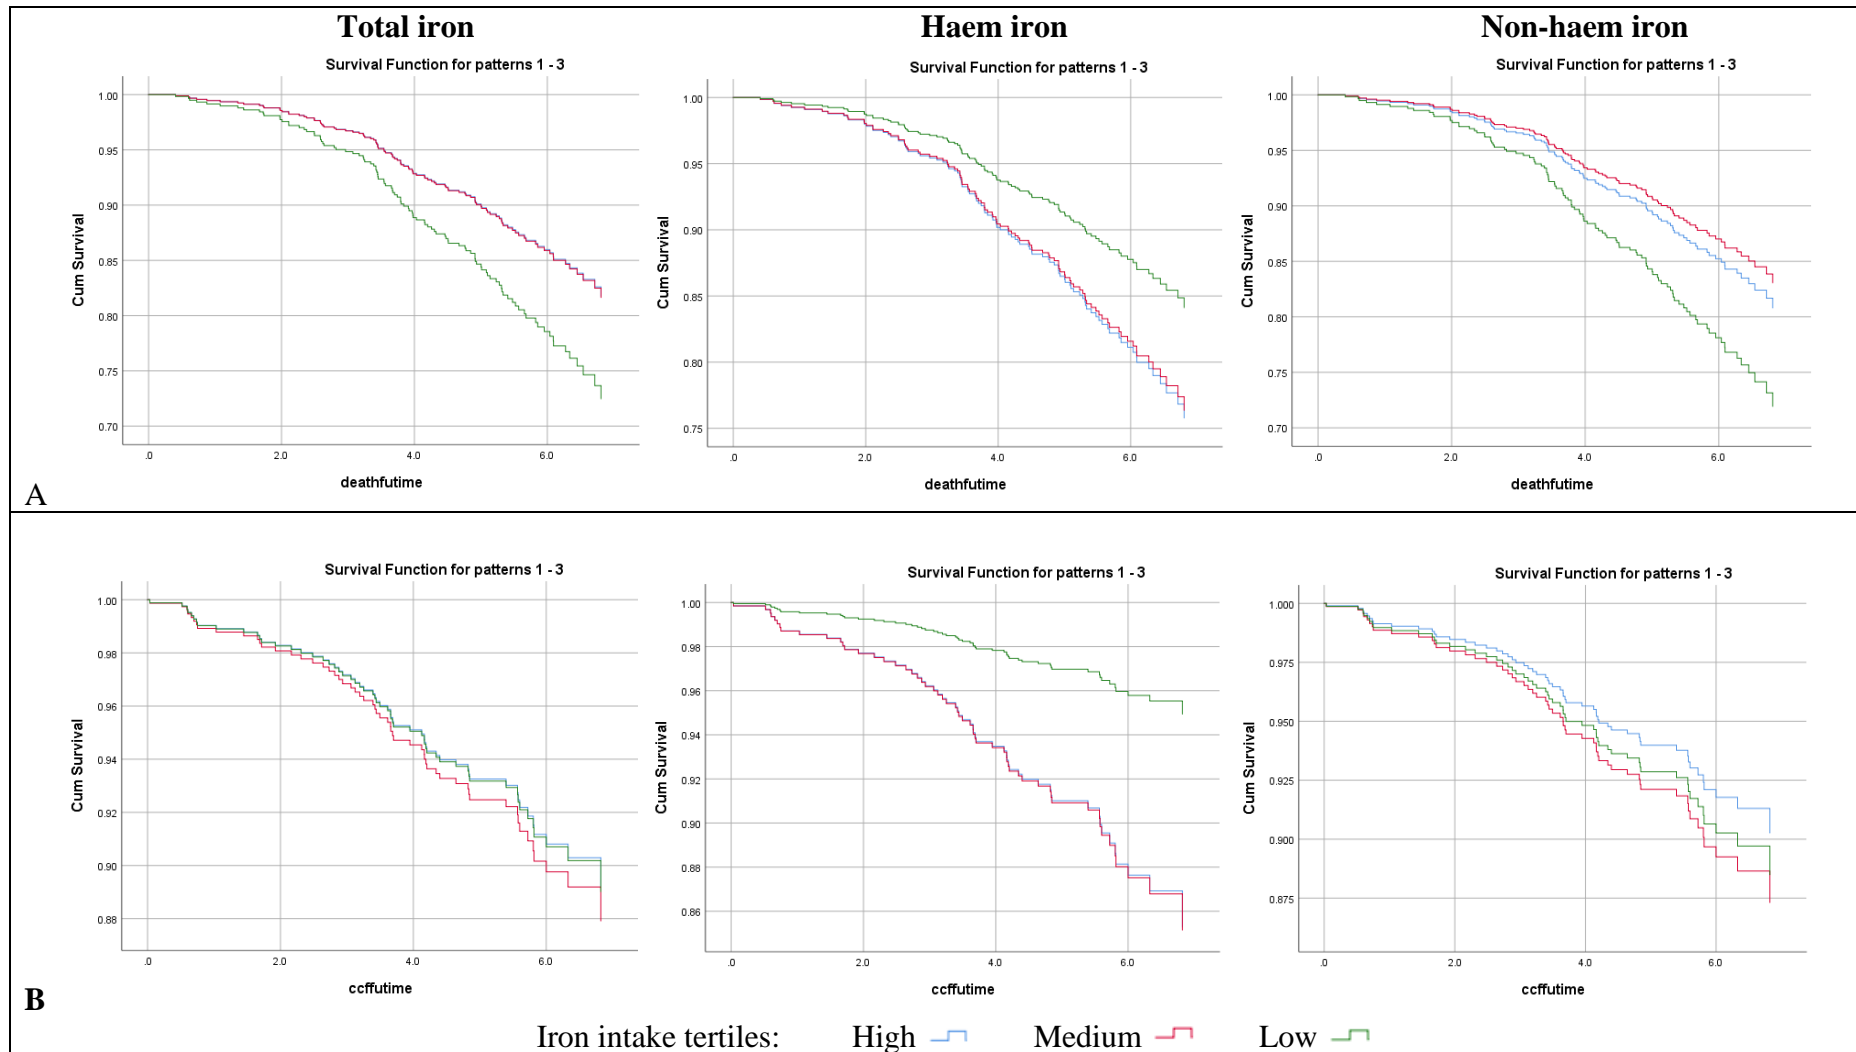

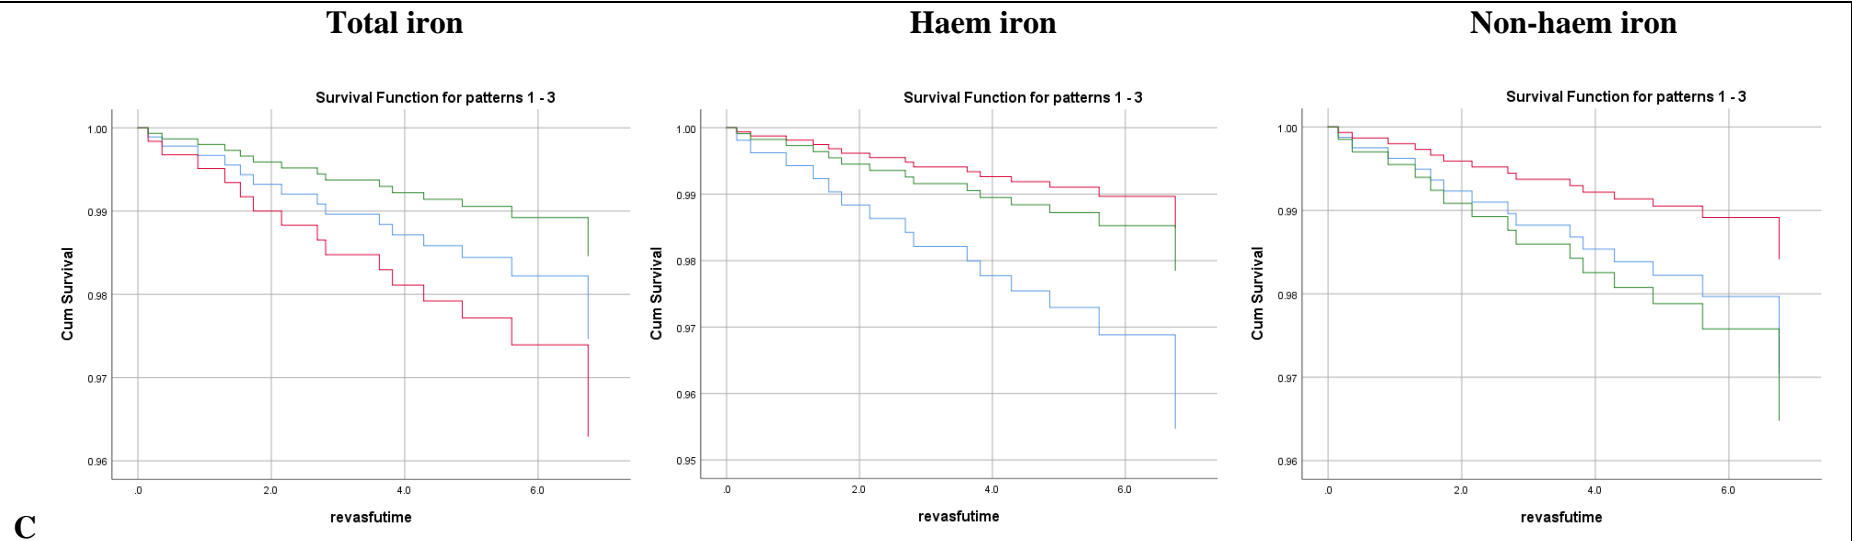

**C**

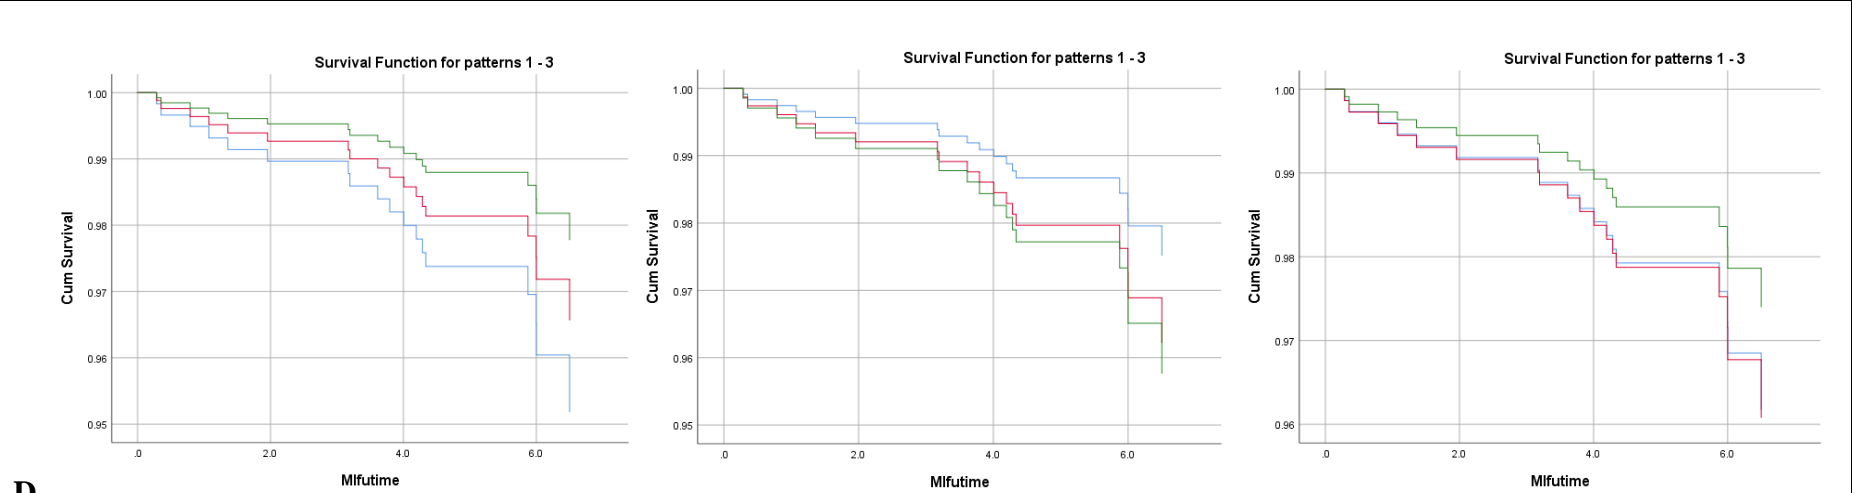

**D**

Iron intake tertiles: High  Medium  Low 



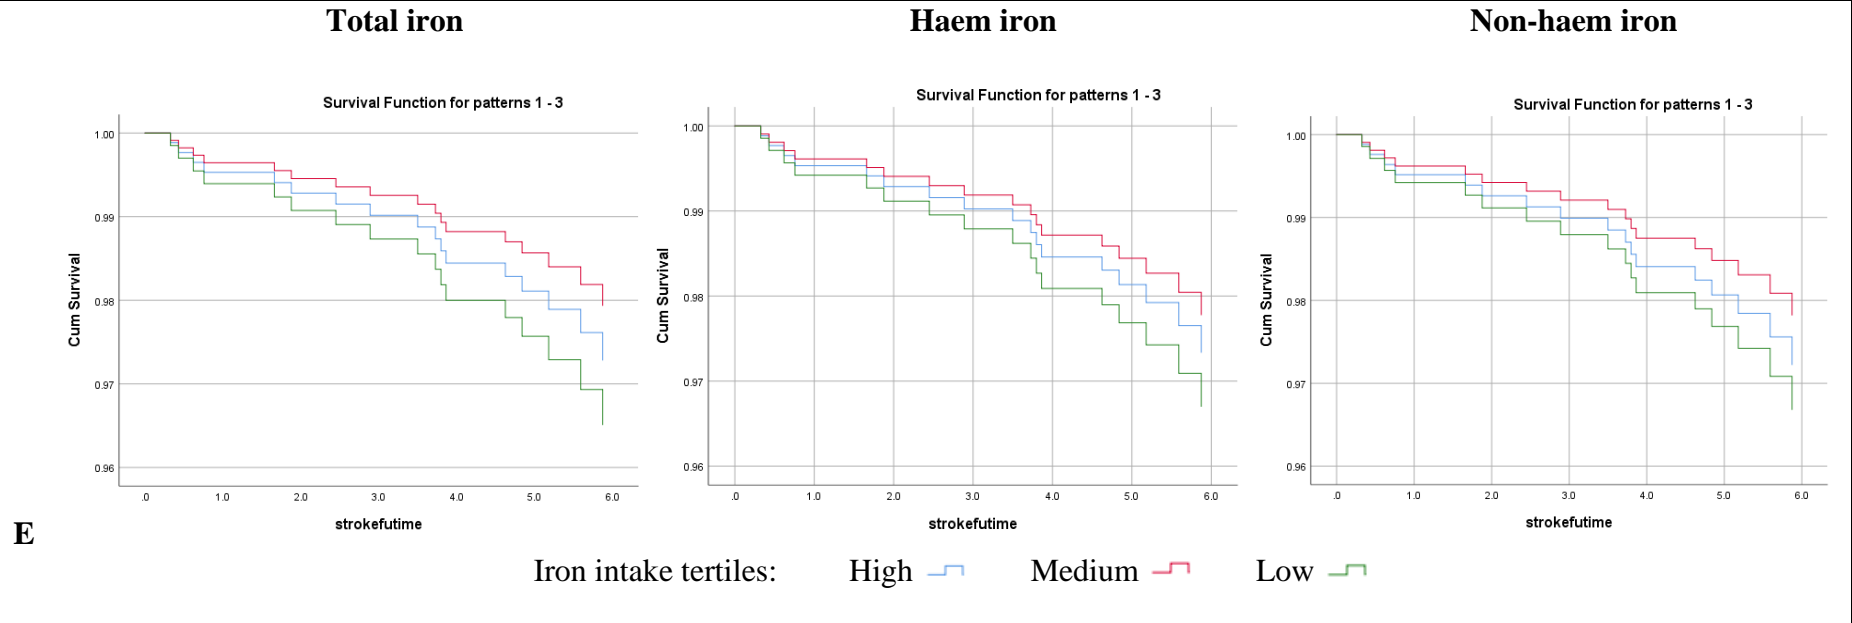

Supplement: MOESM1 [file 25572686]
